# Supplementary material for: WITHDRAWN: Ultra-high resolution and large range on-chip Fano-enhanced thermometer based on spectral analysis
Source: Research Square preprint supplement (doi:10.21203/rs.3.rs-7209070/v1), 2025-08-06
Supplement: Supplementary file 1 [file 33e01301796b0a9a8f2476b0.docx]

# Supplementary Information for “Ultra-high resolution and large range on-chip Fano-enhanced thermometer based on spectral analysis”

## S1. The method to obtain accurate collective shift from spectra

We will explain the reason for the transformation of the spectra in this part. The output spectra at 15 ℃ and 20 ℃ are shown in Figure S1, denoted as *T*15℃ and *T*20℃. If these two spectra are directly brought into the cross-correlation function for calculation, the collective shift is 1, corresponding to 0.1 pm, which is obviously wrong. To capture the characteristics of the Fano resonance peaks and also reflect the variation of the MZI interference spectrum, we propose a function, , to transform the spectra, and then bring them, denoted as *D*15℃ and *D*20℃, into the cross-correlation function calculation to obtain the correct results, -4008, that is -400.8 pm, which approximately matches the resonance wavelength shift of silicon-based resonators to temperature variations, 80 pm/℃.


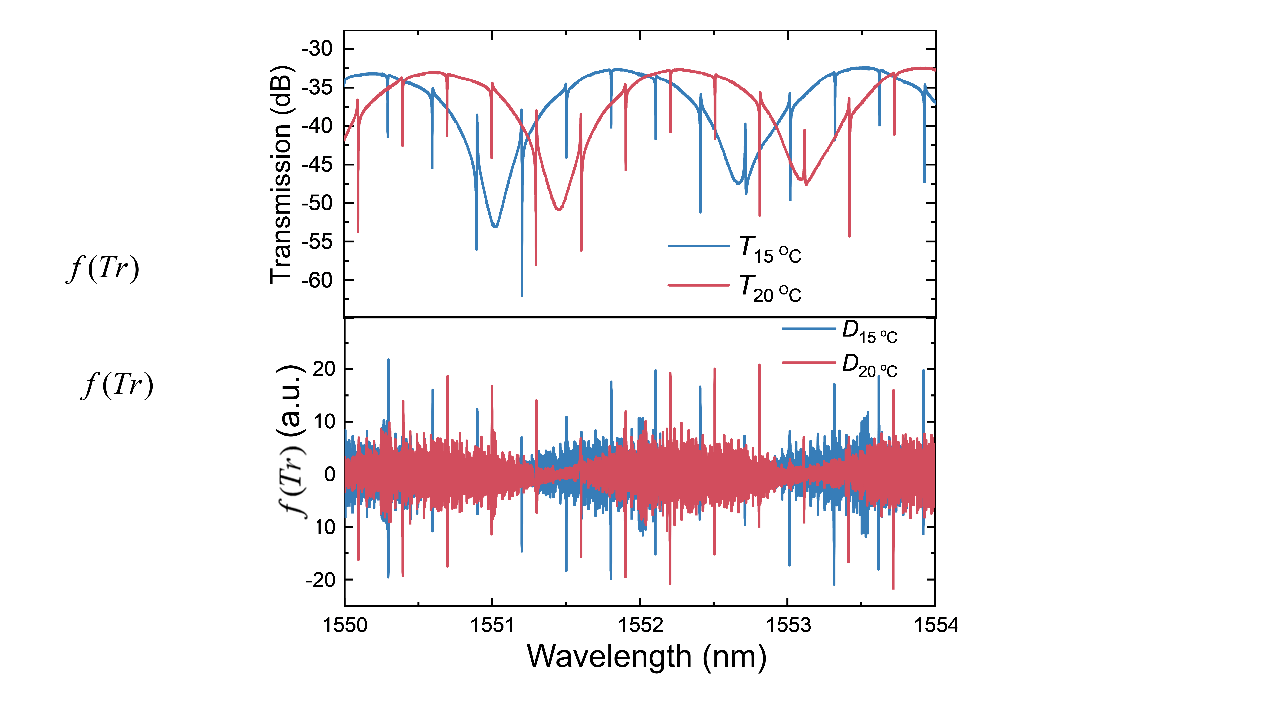


Figure S1. The original spectra and transformed spectra at 15 ℃ and 20℃.

## S2. The table of the collective shift and two parameters of the database

The collective shift and two calibration parameters, *shift*, *m* and *r*, of neighboring spectra in the *D_database* are calculated and recorded in the reference table, shown in Table S1.

Table S1. The reference table for *shift*, *m* and *r*.

| Database  temperature (℃) | *shift* | *m* (×105) | *r* |
| --- | --- | --- | --- |
| 15.00, 20.00 | –4008 | 1.14 | 0.358 |
| 20.00, 25.00, | –4021 | 1.17 | 0.366 |
| 25.00, 30.00 | –4054 | 1.14 | 0.358 |
| 30.00, 35.00 | –4068 | 1.14 | 0.340 |
| 35.00, 40.00 | –4061 | 1.18 | 0.344 |
| 40.00, 45.00 | –4091 | 1.02 | 0.329 |
| 45.00, 50.00 | –4120 | 1.09 | 0.353 |
| 50.00, 55.00 | –4136 | 1.01 | 0.321 |
| 55.00, 60.00 | –4143 | 1.20 | 0.363 |
| 60.00, 65.00 | –4174 | 1.15 | 0.335 |
| 65.00, 70.00 | –4194 | 1.12 | 0.306 |
| 70.00, 75.00 | –4210 | 0.96 | 0.262 |
| 75.00, 80.00 | –4208 | 1.05 | 0.282 |

## S3. The calculation results of the measured spectrum at 47.76 ℃

For example, when a measured spectrum (at 47.76 ℃) and the reference spectra in the database are brought into the cross-correlation function for calculation, six possible temperatures can be obtained, denoted as T1, T2, T3, T4, T5, and T6, as shown in Table S2. It is crucial and essential to distinguish the reliable calculated results from these temperatures. Therefore, we propose a method to enhance the reliability of result extraction by leveraging the three calibration parameters in conjunction with the SVM model.

Table S2. The calculation results of *shift*, *m* and *r* for the measured spectrum (at 47.76 ℃) and the databases (*D_database*).

| Measured and database  temperatures (℃) | *shift* | Calculated  results (℃) | *m* (×105) |  | *r* |
| --- | --- | --- | --- | --- | --- |
| 47.76, 25.00 | 3468 | T1: 29.28 | 0.96 |  | 0.311 |
| 47.76, 30.00 | –582 | T2: 29.28 | 0.78 |  | 0.229 |
| 47.76, 45.00 | 2278 | T3: 47.76 | 1.12 |  | 0.356 |
| 47.76, 50.00 | –1841 | T4: 47.77 | 1.08 |  | 0.351 |
| 47.76, 65.00 | 778 | T5: 65.93 | 0.72 |  | 0.210 |
| 47.76, 70.00 | –3420 | T6: 65.92 | 0.84 |  | 0.219 |
